# Supplementary material for: Flat-on ambipolar triphenylamine/C60 nano-stacks formed from the self-organization of a pyramid-sphere-shaped amphiphile
Source: Royal Society of Chemistry journal article supplement (doi:10.1039/c5sc04242a), 2016-01-01
Supplement: c5sc04242a1.pdf [file c5sc04242a1.pdf]

## Supplementary information

### **The Flat-on Ambipolar Triphenylamine/C<sub>60</sub> Nano-Stacks Formed from the Self-Organization of a Pyramid-Sphere Shape Amphiphile**

Wei-Wei Liang,<sup>a</sup> Chi-Feng Huang,<sup>a</sup> Kuan-Yi Wu,<sup>a</sup> San-Lien Wu,<sup>a</sup> Shu-Ting Chang,<sup>a</sup> Yen-Ju Cheng,<sup>a</sup> and Chien-Lung Wang<sup>a\*</sup>

*<sup>a</sup>Department of Applied Chemistry, National Chiao Tung University, 1001 Ta Hsueh Road Hsin-Chu, 30010, Taiwan  
E-Mail: kclwang@nctu.edu.tw*

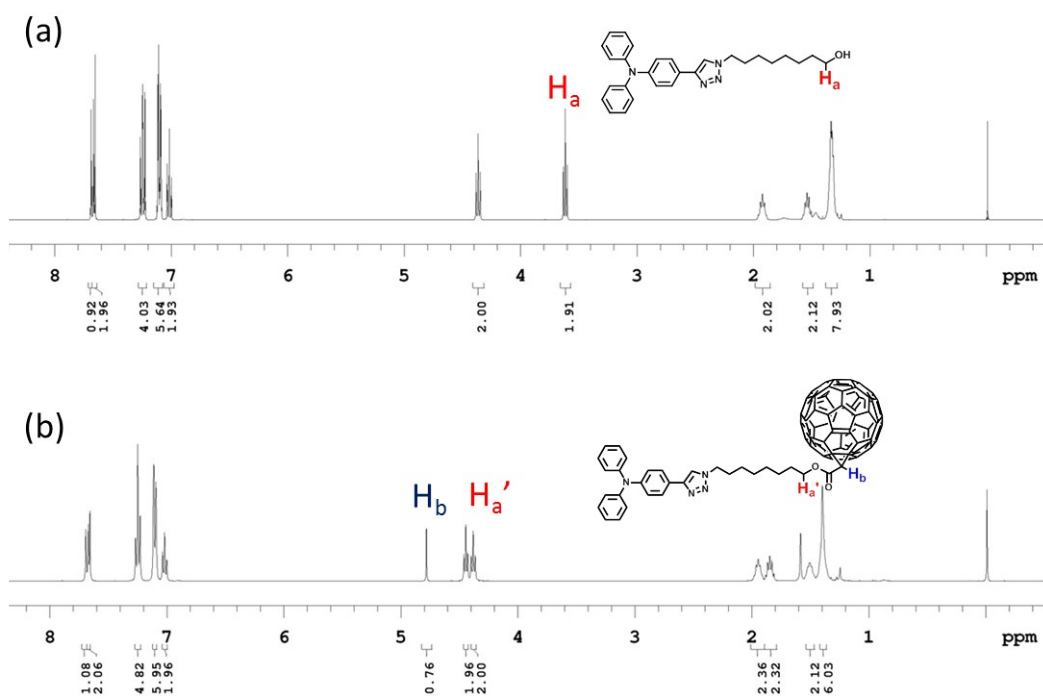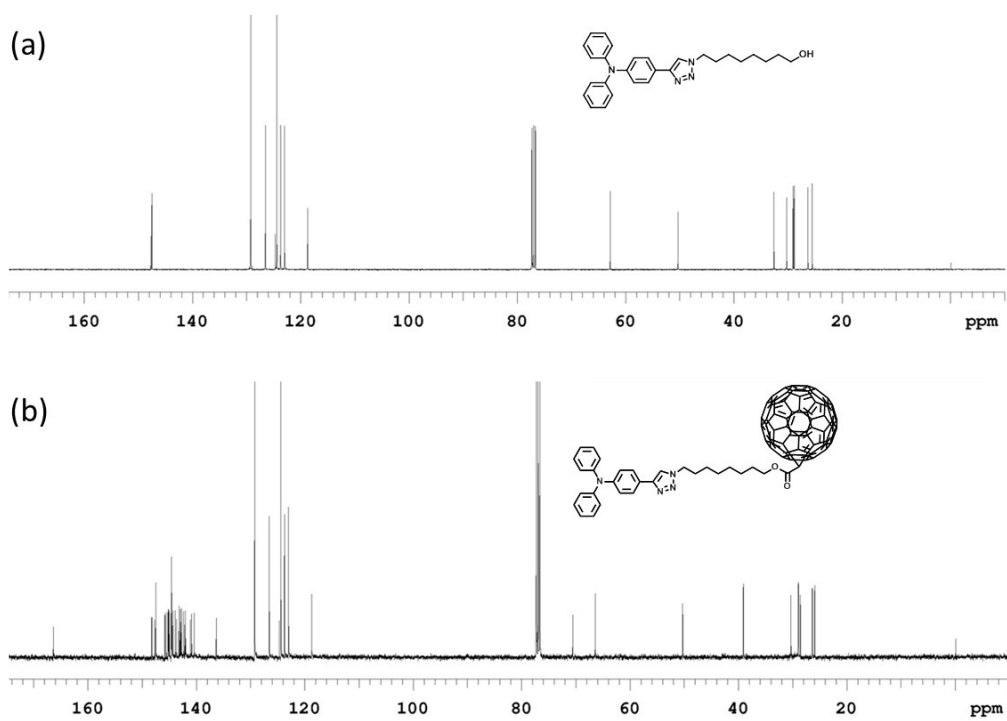

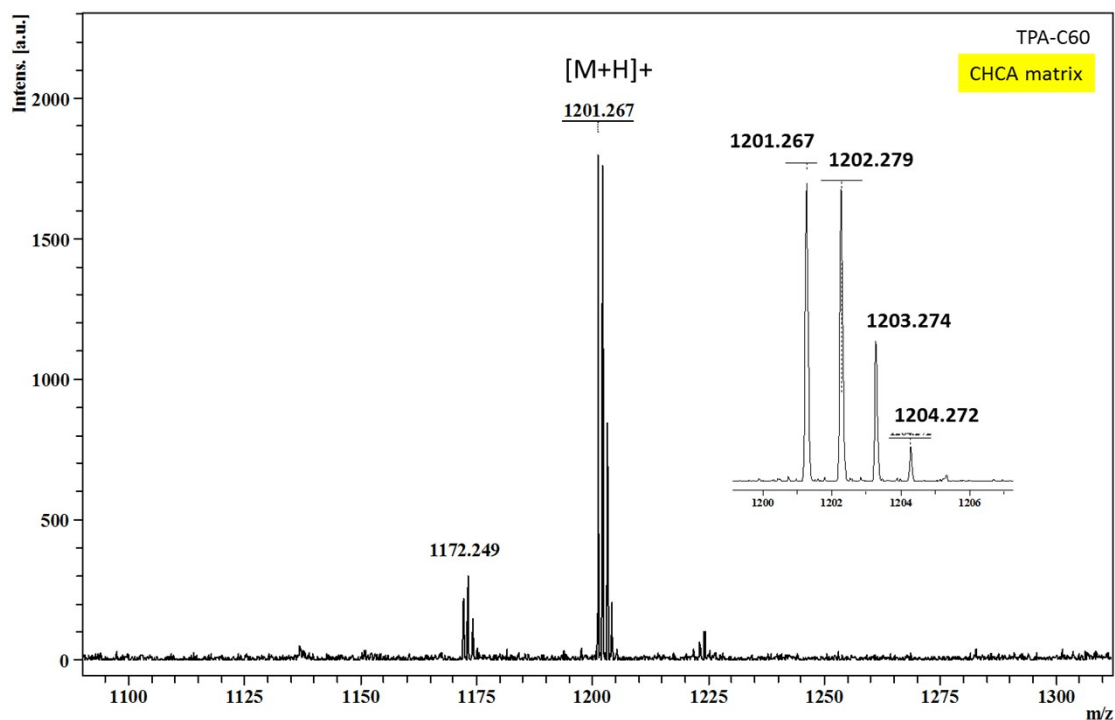

Fig. S3 MALDI TOF mass spectra of TPA-C<sub>60</sub>.

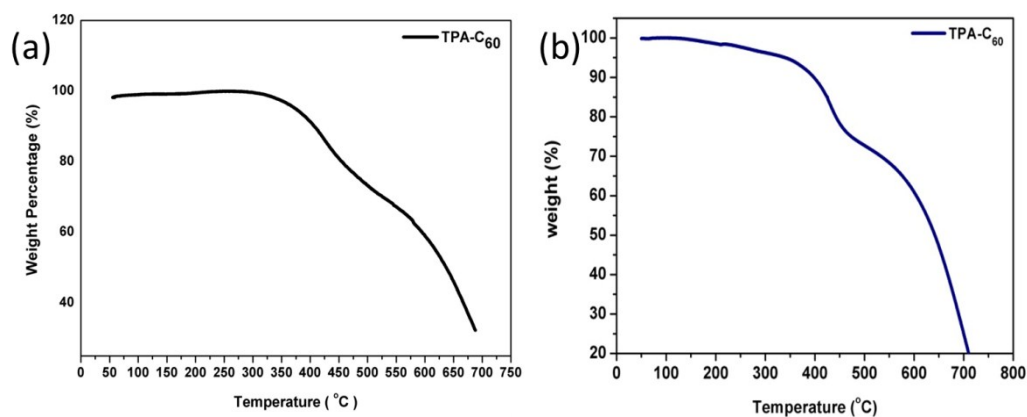

Fig. S4 Thermogravimetry analysis of the TPA-C<sub>60</sub> samples dried by (a) a cryo pump ( $\sim 6 \times 10^{-7}$  torr) and (b) a mechanical pump ( $\sim 10^{-2}$  torr).

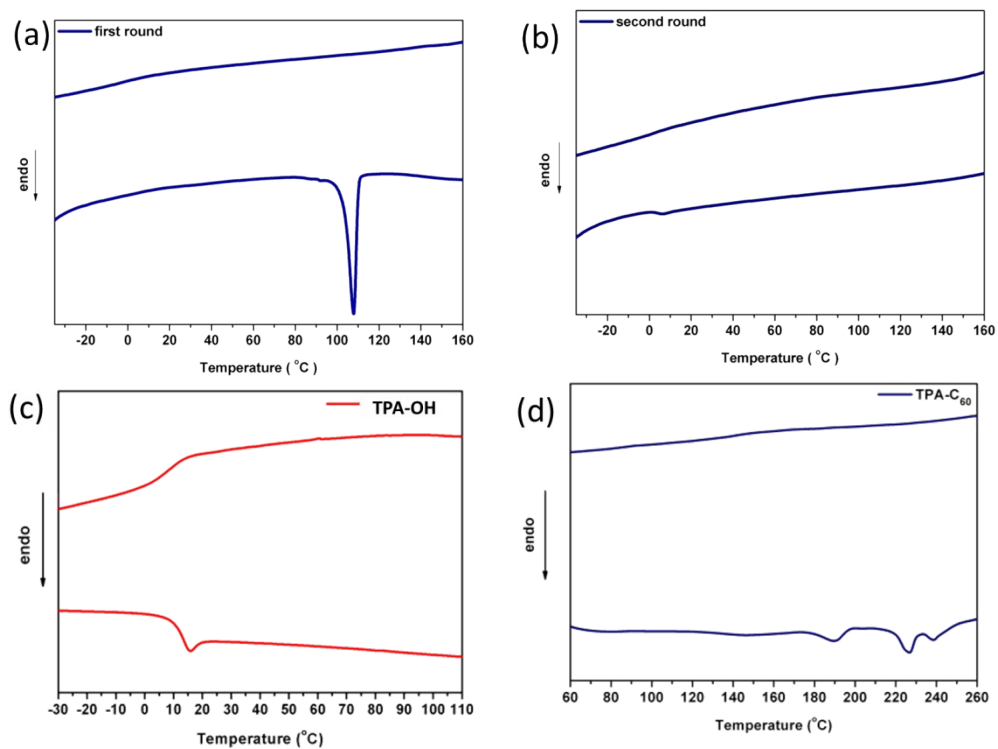

**Fig. S5** DSC curves of (a) (b) 4-ethynyl-N,N-diphenylamine, (c) TPA-OH, (d) TPA-C<sub>60</sub>

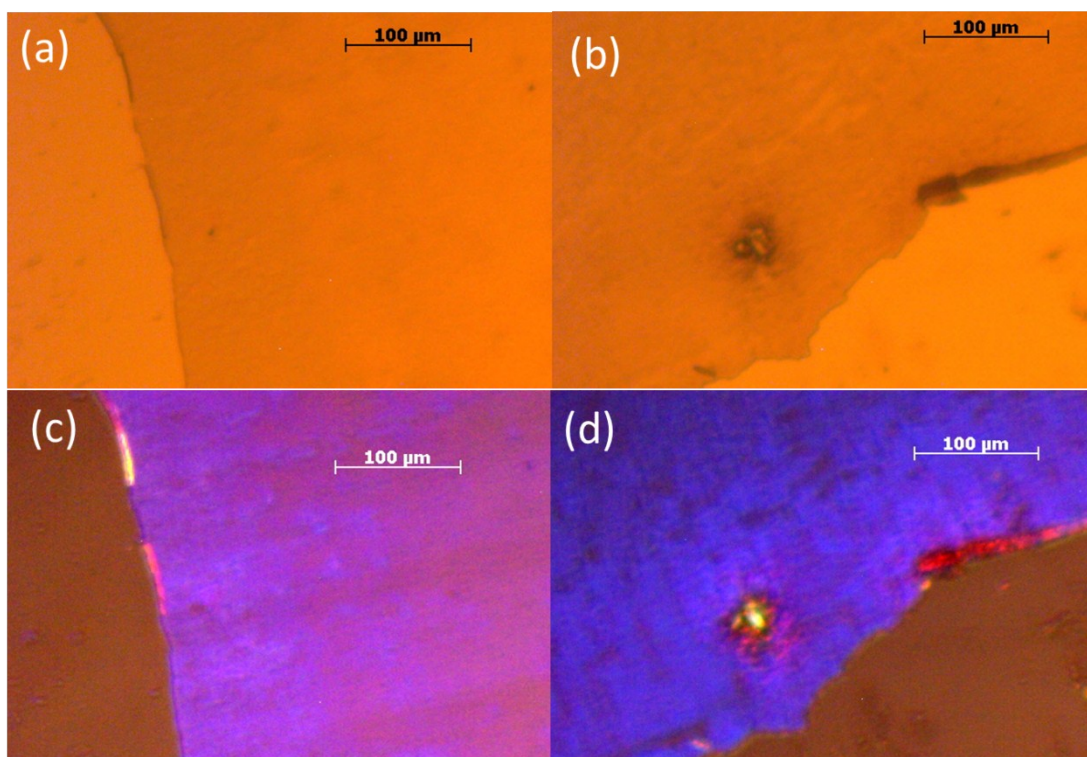

**Fig. S6** Optical microscope (OM) images (a) (b), and POM images (c) (d) of TPA-C<sub>60</sub> processed via the PAC method with ODCB.

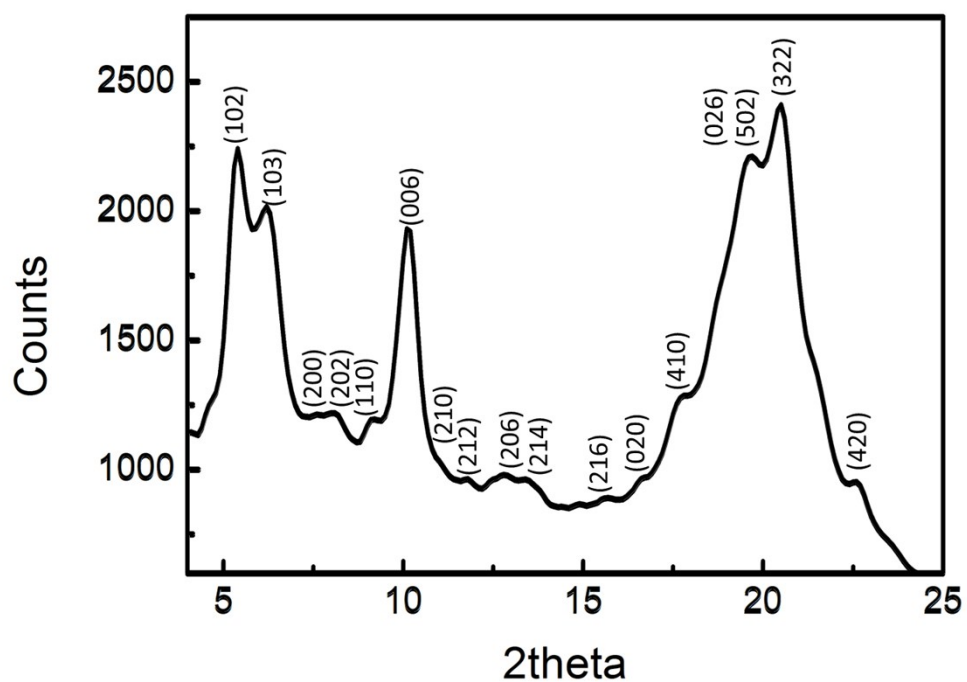

Fig. S7 The powder X-ray diffraction pattern of TPA-C<sub>60</sub>.

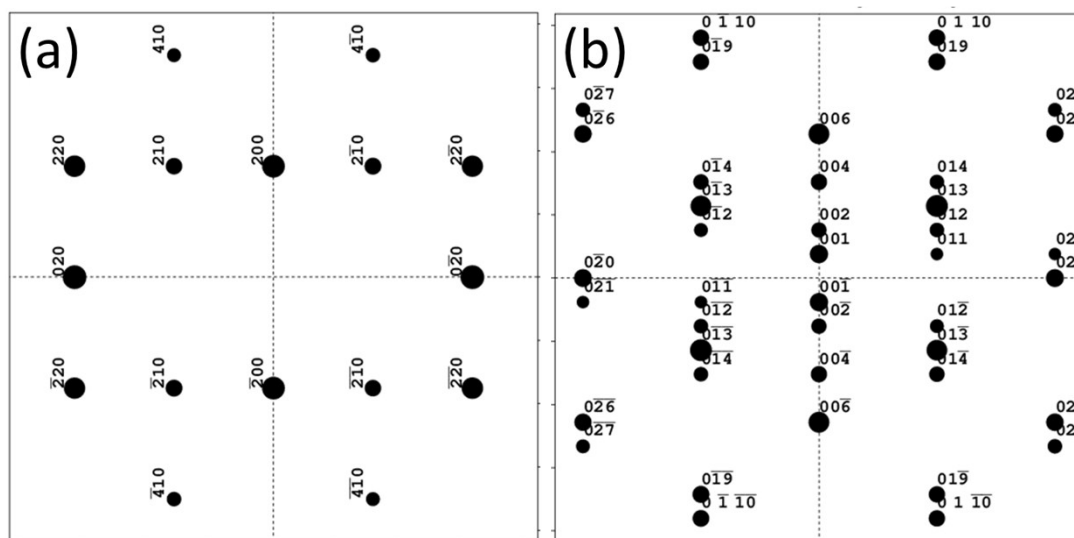

Fig. S8 Simulated ED patterns of TPA-C<sub>60</sub> along (a) the [001] zone and (b) the [100] zone.

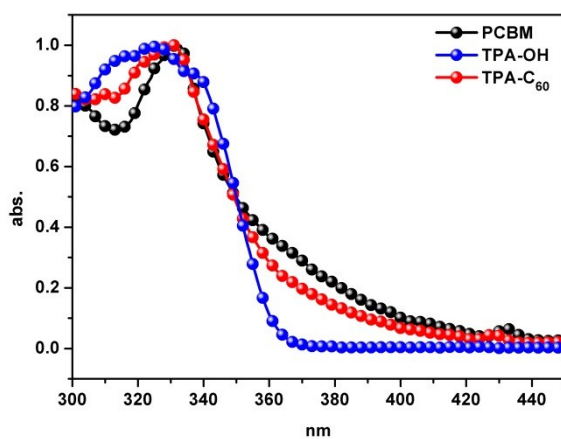

**Fig. S9** UV-Vis spectra of TPA-C<sub>60</sub>, TPA-OH, and PCBM.

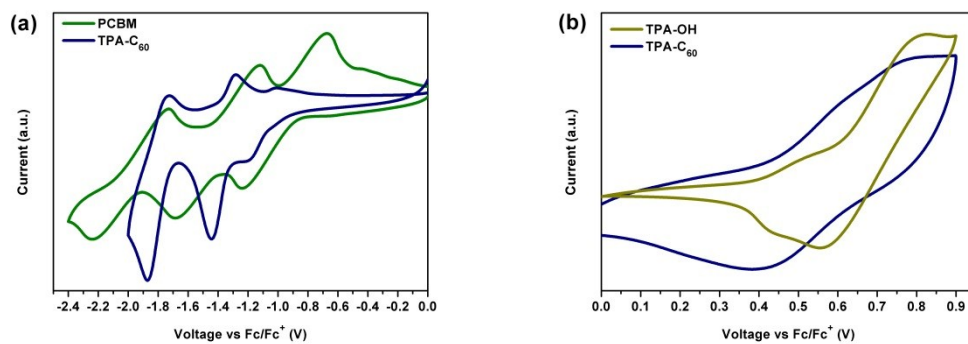

**Fig. S10** (a) Reduction and (b) oxidation cyclic voltammetry curves of TPA-C<sub>60</sub> and comparisons.

**Table S1.** The d-spacings of the (hkl) planes of the crystalline phase of **TPA-C<sub>60</sub>**.

| (hkl) plane | Theoretical d-spacing (Å) | Experimental d-spacing (Å) |
|-------------|---------------------------|----------------------------|
| (102)       | 16.4                      | 16.3                       |
| (103)       | 14.2                      | 14.2                       |
| (200)       | 11.4                      | 11.6                       |
| (202)       | 10.4                      | 10.9                       |
| (110)       | 9.7                       | 9.7                        |
| (006)       | 8.5                       | 8.7                        |
| (210)       | 7.8                       | 8.0                        |
| (210)       | 7.5                       | 7.5                        |
| (206)       | 6.8                       | 6.9                        |
| (214)       | 6.7                       | 6.6                        |
| (216)       | 5.7                       | 5.7                        |
| (020)       | 5.4                       | 5.3                        |
| (410)       | 5.0                       | 5.0                        |
| (026)       | 4.5                       | 4.5                        |
| (502)       | 4.5                       | 4.5                        |
| (322)       | 4.3                       | 4.3                        |
| (420)       | 3.9                       | 3.9                        |

**Table S2.** Reduction potential, oxidized potential, HOMO and LUMO energy of PC<sub>61</sub>BM, **TPA-C<sub>60</sub>** and TPA-OH.

|                           | <b>E<sub>ox</sub><sup>onset</sup> [V]</b> | <b>E<sub>re</sub><sup>onset</sup> [V]</b> | <b>HOMO [eV]</b> | <b>LUMO [eV]</b> |
|---------------------------|-------------------------------------------|-------------------------------------------|------------------|------------------|
| <b>PC<sub>61</sub>BM</b>  |                                           | −0.88                                     |                  | −3.91            |
| <b>TPA-C<sub>60</sub></b> | 0.41                                      | −0.85                                     | −5.20            | −3.94            |
| <b>TPA-OH</b>             | 0.40                                      |                                           | −5.19            |                  |
